# Supplementary material for: The Viral G-Protein-Coupled Receptor Homologs M33 and US28 Promote Cardiac Dysfunction during Murine Cytomegalovirus Infection
Source: MDPI journal article supplement (doi:10.3390/v15030711), 2023-03-09
Supplement: s1 [file s1]

**Table S1.** Primer list used for cellular gene expression studies (Figure 7 and Figure S5).

|                 |                                         |                                  |
|-----------------|-----------------------------------------|----------------------------------|
| BMP2            | F 5'-AGTAGTTTCCAGCACCGAATTA-3'          | R 5'-TTCATAACCTGGTGTCCAATAG-3'   |
| RUNX2           | F 5'-TGGCTTGGGTTTCAGGTTAG-3'            | R 5'-GGTTTCTTAGGGTCTTGGAGTG-3'   |
| MMP2            | F 5'-CTGGAATGCCATCCCTGATAA-3'           | R 5'-GGTCTCCAGCTTCAGGTAATAA-3'   |
| MMP3            | F 5'-GGATCTTCGCAGTTGGAATTTG-3'          | R 5'-GATGCCTTCCTTGGATCTCTT-3'    |
| MMP9            | F 5'-TGCACTGGGCTTAGATCATTG-3'           | R 5'-TGCCGTCTATGTCGCTTTTATTC-3'  |
| MMP12           | F 5'-CTGGAGGTATGATGTGAGGCAG-3'          | R 5'-CTGGGAAGTGTGTGGAAATCAG-3'   |
| Biglycan        | F 5'-ATTGCCCTACCCAGAACTTGAC-3'          | R 5'-GCAGAGTATGAACCCTTTCTCG-3'   |
| Decorin         | F 5'-TGATGCACCCAGCCTGAAAG-3'            | R 5'-TCCATAACGGTGATGCTGTTGAA-3'  |
| Lumican         | F 5'-TCGAGCTTGATCTCTCCTAT-3'            | R 5'-TGGTCCCAGGTCTTACAGAA-3'     |
| Periostin       | F 5'-GATAAAATACATCCAAATCAAGTTTGTTTCG-3' | R 5'-AAACTCTGTGGTCTGGCCTCTGGG-3' |
| Fibronectin 1   | F 5'-GTGCTTCATGCCGCTAGAT-3'             | R 5'-GTGTGGATTGACCTTGGTAGAG-3'   |
| Collagen Type 1 | F 5'-TTCTAGTTCCTGGGCCTATCT-3'           | R 5'-GATGCAGGACAGACCAAGAG-3'     |
| Collagen Type 3 | F 5'-GGGAAAGGAGTCCACCTTTATT-3'          | R 5'-GAATCTGTCCACCAAGTGCTTAC-3'  |
| SMAD1           | F 5'-GGGAAAGGAGTCCACCTTTATT-3'          | R 5'-GAAAGCCGTGGTGGTAGTT-3'      |
| SMAD2           | F 5'-GCTGAGTGCCTAAGTGATG-3'             | R 5'-TACAGCCTGGTGGGATCTTA-3'     |
| SMAD3           | F 5'-TTCCATTCCCGAGAACTAA-3'             | R 5'-TCACTGGTTTCTCCATCTTCAC-3'   |
| SMAD4           | F 5'-CCAGGATGGACTATGAAAT-3'             | R 5'-GCAGCAAACACATCTCTCAAC-3'    |
| SMAD5           | F 5'-GATTGTTGGGAAACAAG-3'               | R 5'-CTCCATAGCACCTTCTTCTTC-3'    |
| PDGFd           | F 5'-CGCAGAGAGCATCCATCA-3'              | R 5'-GTCACCTGAATGTTCTCCTCTC-3'   |
| VEGFb           | F 5'-TCTGAGCATGGAACCTCATGG-3'           | R 5'-TCTGCATTACATTGGCTGT-3'      |
| EGFR            | F 5'-AGAGCGCCTTCCACAGCCAC-3'            | R 5'-ACTCTCGGAACCTTGGGCGG-3'     |
| IL6             | F 5'-ACACATGTTCTCTGGGAAATCGT-3'         | R 5'-AAGTGCATCATCGTTGTTACATA-3'  |
| IL10            | F 5'-ATGCTGCCTGCTCTTACTGACTG-3'         | R 5'-CCCAAGTAACCTTAAAGTCCTGC-3'  |
| TGFb            | F 5'-ATGCTAAAGAGGTCACCCGC-3'            | R 5'-TGCTTCCCGAATGTCTGACG-3'     |
| TNFa            | F 5'-CCACGCTCTTCTGTCTACTGA-3'           | R 5'-GCTACAGGCTTGCTACTCG-3'      |
| GAPDH           | F 5'-CTCACAATTTCCATCCAGAC-3'            | R 5'-TTTTTGGGTGCAGCGAAC-3'       |
